# Supplementary material
Source: publisher figshare collection journal article supplement (https://tandf.figshare.com/ndownloader/files/15201152)
Supplement: Supplementary file 1 [file 15201152]

**Supplementary files**

**Supplementary file 1: Overview of TTS clips**

| **Clip** | Quick Clip Pro  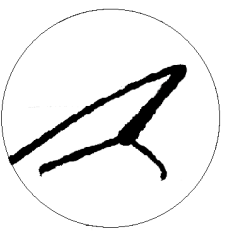 | Quick Clip 2  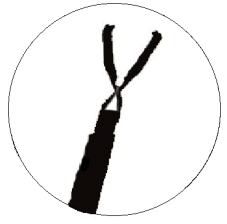 | Resolution clip  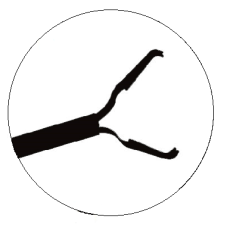 | Instinct clip  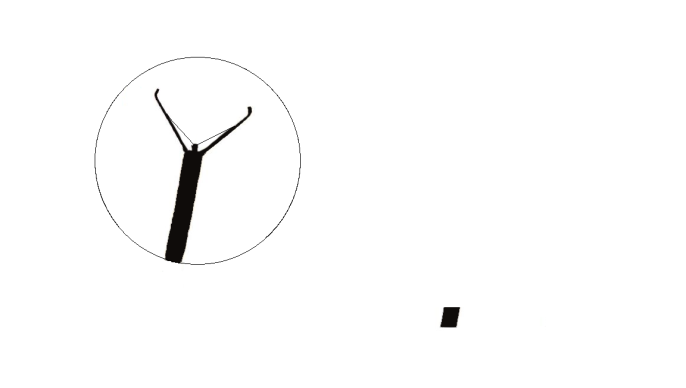 | Hemoclip  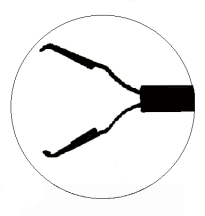 | Chinese hemoclip  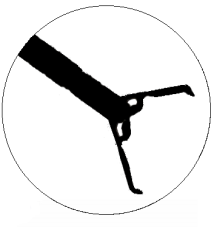 | DuraClip  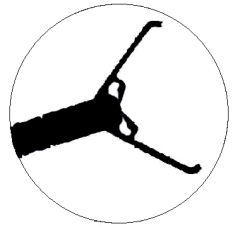 | SureClip  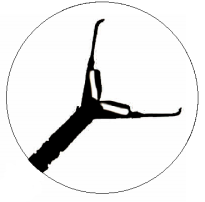 |
| --- | --- | --- | --- | --- | --- | --- | --- | --- |
| **Brand** | Olympus, Tokyo Japan | Olympus, Tokyo Japan | Boston Scientific, Natick MA | Cook Medical, N USA | Life Partners Europe, Bagnelot, France | Zhuji Pengtian Medical Instrument Co., Zhejiang, China | Conmed, NY, USA | Micro-Tech Endoscopy, MI, USA |
| **Release year** | 2002 | 2005 | 2003 | 2011 | 2017 ? | 2016 | 2016 | 2018 |
| **Opening span** | 11 mm | 9 mm (long: 11 mm) | 11 mm | 16 mm | 9/11/13/16 mm | 8/11/16mm | 11 mm or 16 mm | 11 mm or 16 mm |
| **360ᵒ rotatable** | ✓ | ✓ | -/ ✓  (new version Resolution 360 is fully rotatable) | ✓ | ✓ | ✓ | ✓ | ✓ |
| **Repositionable** | ✓ (up to 5 times) | - | ✓ (up to 5 times) | - | ✓ (Also offers the ‘One drop’clip’ which is not repositionable) | ✓ | ✓ (unlimited) | - |
| **Average duration of retention** | ? | Average 9.4 days on normal mucosa.  1-3 weeks on ulcerative mucosa | 4 weeks - 180 days  4.2% retention at first FU (3-6 months) | 8.6% retention at first FU (3-6 months) | ? | ? | ? | ? |

- All clips, except for the QuickClip2, are compatible with standard MRI with a static magnetic field of 3.0 Tesla or less and a maximum spatial magnetic gradient of 1600 Gauss/cm or less.

- All clips in the table are ready-to-use. In addition, Olympus also offers the EZ clip, which is not ready to use. The clip applier costs €40 and can be used to place multiple clips within one person before throwing it away. EZ clips cost €10, so the more clips are needed in one session, the cheaper the price per placement.

- Prices are approximations and may not reflect the exact prices due to price variations.

- Excreted clips are disposed of via the sewage system, where it gets filtered out of the water together with other metal remnants.
